# Supplementary material for: Synergistic enhancement of photocatalytic hydrogen production in TiO2 nanosheets through light-induced defect formation and Pt single atoms
Source: Royal Society of Chemistry journal article supplement (doi:10.1039/d4ta01809e), 2024-01-01
Supplement: d4ta01809e1.pdf [file d4ta01809e1.pdf]

**Synergistic enhancement of photocatalytic hydrogen production in TiO<sub>2</sub> nanosheets  
through light-induced defect formation and Pt single atoms**

Majid Shahsanaei,<sup>a</sup> Nastaran Farahbakhsh,<sup>a</sup> Sadegh Pour-Ali,<sup>b,c</sup> Annika Schardt,<sup>d</sup> Setareh  
Orangpour,<sup>a</sup> Carsten Engelhard,<sup>d,e</sup> Shiva Mohajernia,<sup>b</sup> Manuela S. Killian,<sup>\*a</sup> Sina Hejazi <sup>\*a,f</sup>

<sup>a</sup> Chemistry and Structure of novel Materials, Department of Chemistry and Biology, University  
of Siegen, Paul-Bonatz-Str. 9-11, 57076 Siegen, Germany

<sup>b</sup> Faculty of Materials Engineering, Sahand University of Technology, Tabriz, 51335-1996, Iran

<sup>c</sup> Department of Chemical and Materials Engineering, NRGMATs, University of Alberta,  
Donadeo Innovation Centre for Engineering, Edmonton Canada

<sup>d</sup> Analytical chemistry, Department of Chemistry and Biology, University of Siegen, Adolf-  
Reichwein-Str. 2, D-57076 Siegen, Germany

<sup>e</sup> Federal Institute for Materials Research and Testing (BAM), Richard-Willstätter Str. 11, D-  
12489 Berlin, Germany

<sup>f</sup> National Research Council, Nanotechnology Research Centre, Edmonton, Alberta T6G 2M9,  
Canada

\* Corresponding authors' emails: [manuela.killian@uni-siegen.de](mailto:manuela.killian@uni-siegen.de) (M.S. Killian) and  
[hejazi.sina@ualberta.ca](mailto:hejazi.sina@ualberta.ca) (S. Hejazi)

Table S1. Summary of experimental conditions for each TiO<sub>2</sub>-NSs sample

| Conditions              | Abbreviation | Total time under UV illumination (min.) | Resting time before precursor addition (min.) |
|-------------------------|--------------|-----------------------------------------|-----------------------------------------------|
| Light-induced samples   | LI0          | 10                                      | 0                                             |
|                         | LI5          | 10                                      | 5                                             |
|                         | LI10         | 10                                      | 10                                            |
|                         | LI20         | 10                                      | 20                                            |
|                         | LI60         | 10                                      | 60                                            |
| Photo-deposited samples | PD5          | 15                                      | 0                                             |
|                         | PD10         | 20                                      | 0                                             |

Table S2. AQY values for various TiO<sub>2</sub>-NSs under UV illumination.

| Sample | AQY (%) |
|--------|---------|
| Ref    | 0.01    |
| LI0    | 0.69    |
| LI5    | 2.36    |
| LI10   | 1.92    |
| LI20   | 1.41    |
| LI60   | 1.56    |
| PD5    | 0.63    |
| PD10   | 0.32    |

Table S3. Comparison of the maximum photocatalytic performance of various TiO<sub>2</sub>-based nanomaterials with Pt as the cocatalyst.

| Photocatalyst               | Photoactivity, H <sub>2</sub> generation rate             | Maximum AQY (%) / Wavelength (nm) | Incident light                | Ref.         |
|-----------------------------|-----------------------------------------------------------|-----------------------------------|-------------------------------|--------------|
| TiO <sub>2</sub> NSs        | 1170.35 μmol g <sup>-1</sup> h <sup>-1</sup>              | 2.4 / 365                         | 680 mW cm <sup>-2</sup> UVLED | Current work |
| TiO <sub>2</sub> NSs        | 385 μmol g <sup>-1</sup> h <sup>-1</sup>                  | --- / 365                         | ---                           | 17           |
| TiO <sub>2</sub> NSs-BNS    | 575.6 μmol g <sup>-1</sup> h <sup>-1</sup>                | 2.9 / 365                         | 450 W Xe arc lamp             | 38           |
| TiO <sub>2</sub> NSs-Pt     | 3.75 mL h <sup>-1</sup> g <sup>-1</sup>                   | --- / 365                         | ---                           | 45           |
| TiO <sub>2</sub> nanoflakes | 900 μL                                                    | --- / 365                         | 150 W Xe arc lamp             | 54           |
| TiO <sub>2</sub> film       | 4900 μL                                                   | --- / 365                         | ---                           | 55           |
| TiO <sub>2</sub> nanobelts  | 38.33 mmol mg <sub>Pt</sub> <sup>-1</sup> h <sup>-1</sup> | --- / 320                         | 300 W Xe lamp                 | 56           |
| Black TiO <sub>2</sub>      | 3.30 mmol g <sup>-1</sup>                                 | 33 / 375                          | Fluorescent                   | 57           |
| TiO <sub>2</sub> nanofiber  | 1400 μmol g <sup>-1</sup> h <sup>-1</sup>                 | --- / 365                         | 300 W Xe lamp                 | 58           |

---: The corresponding value has not been reported.

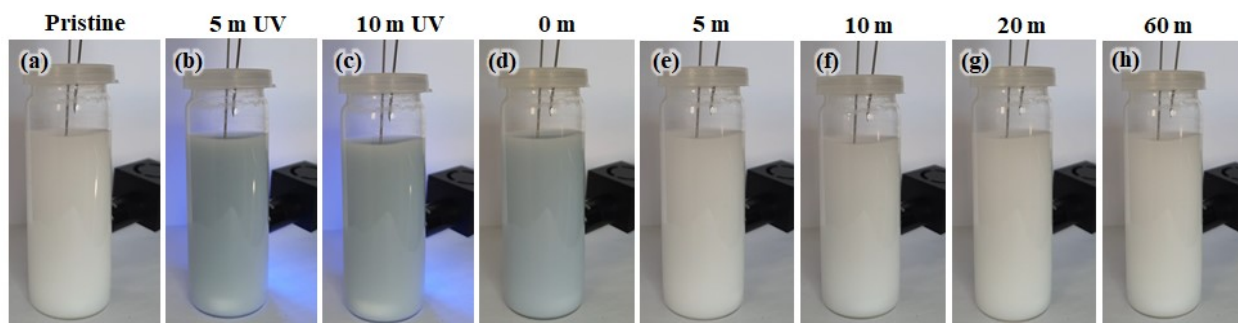

Fig. S1. Various states of  $\text{TiO}_2\text{-NSSs}$ : (a) before light-induced and without Ar purging, and after (b) 5, and (c) 10 minutes only under UV exposure, and after (d) 0, (e) 5, (f) 10, (g) 20, and (h) 60 minutes rest after cutting off the UV-light.

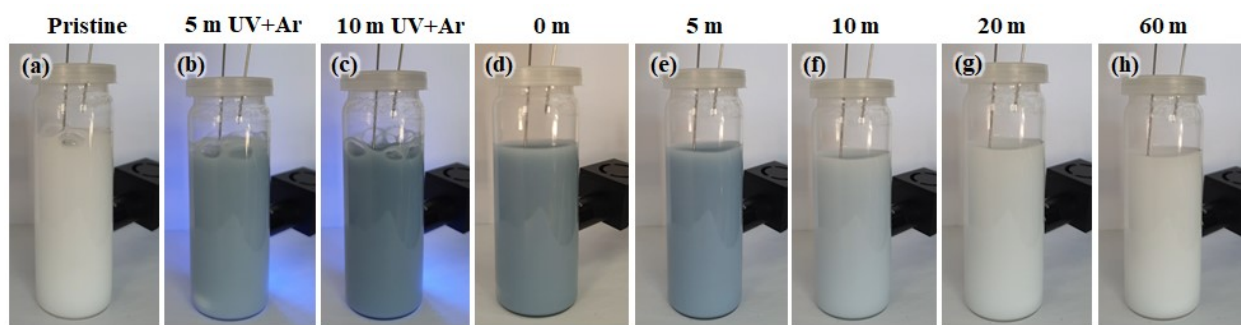

Fig. S2. Various states of  $\text{TiO}_2\text{-NSSs}$ : (a) before light-induced and with Ar purging, and after (b) 5, and (c) 10 minutes under UV exposure and Ar purging, and after (d) 0, (e) 5, (f) 10, (g) 20, and (h) 60 minutes rest after cutting off the UV-light and Ar purging.

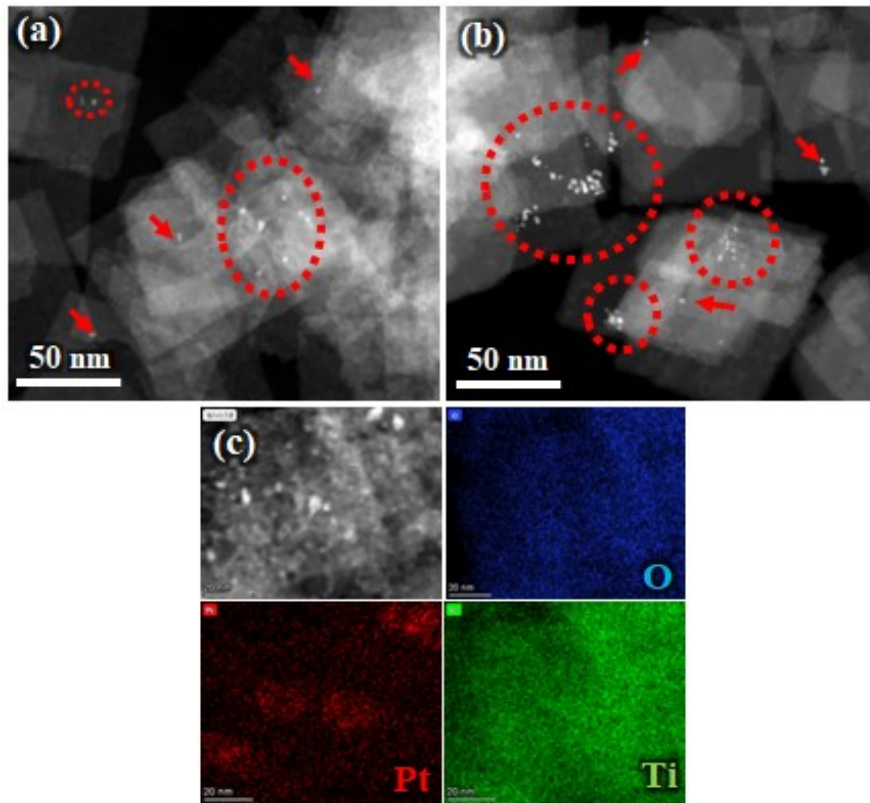

Fig. S3. STEM images from (a) PD5 and (b) PD10 samples. (c) Corresponding elemental mapping of Ti, O, and Pt taken from PD10 sample.

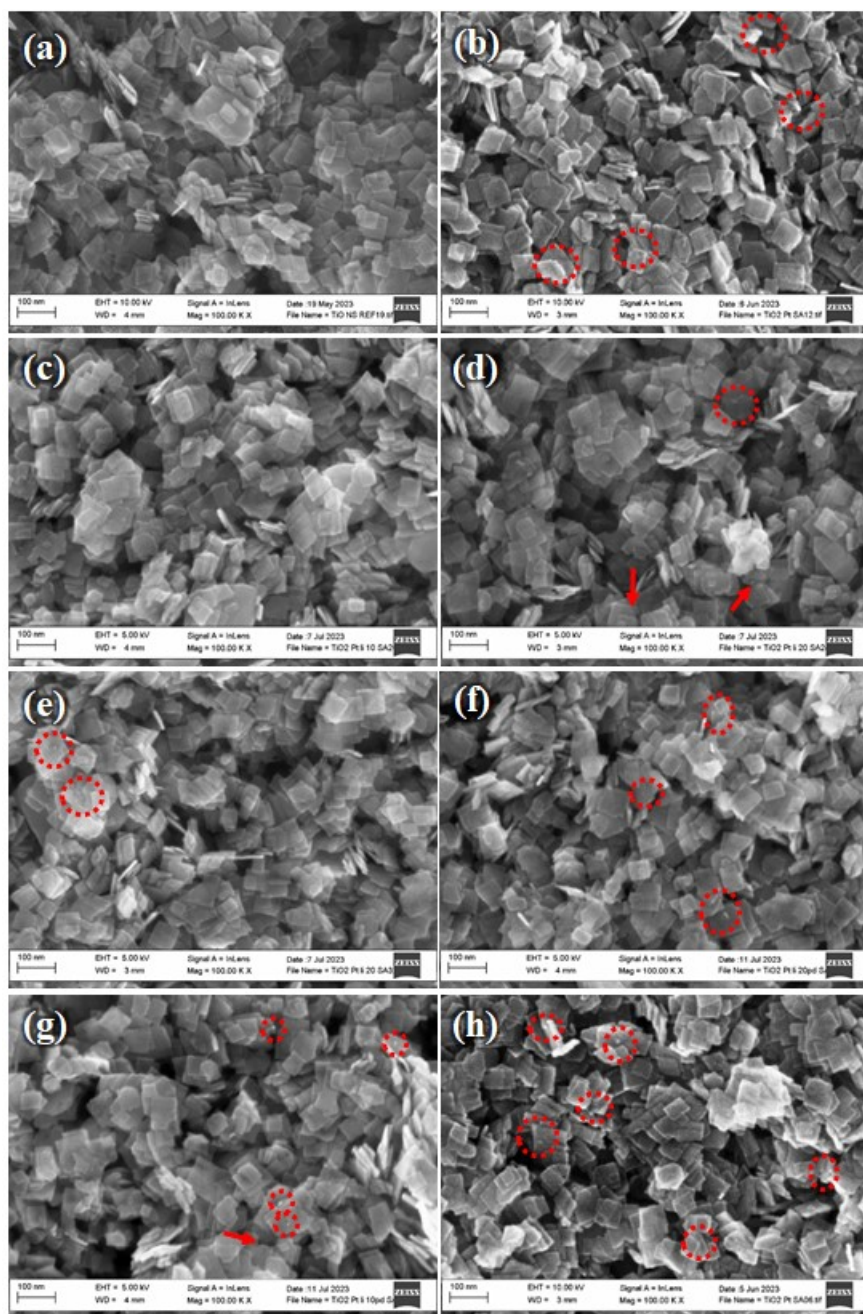

Fig. S4. FESEM images of various samples: (a) pristine  $\text{TiO}_2$ -NSs, (b) LI0, (c) LI5, (d) LI10, (e) LI20, (f) LI60, (g) PD5, and (h) PD10.

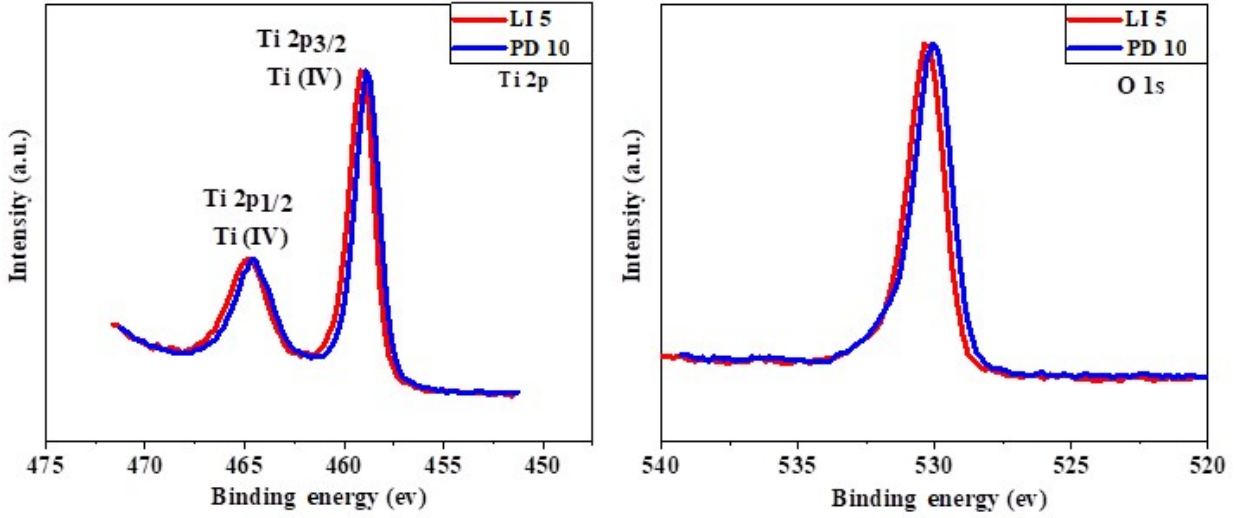

Fig. S5. High-resolution XPS spectra of Ti 2p and O 1s from e LI5 and PD20 samples.

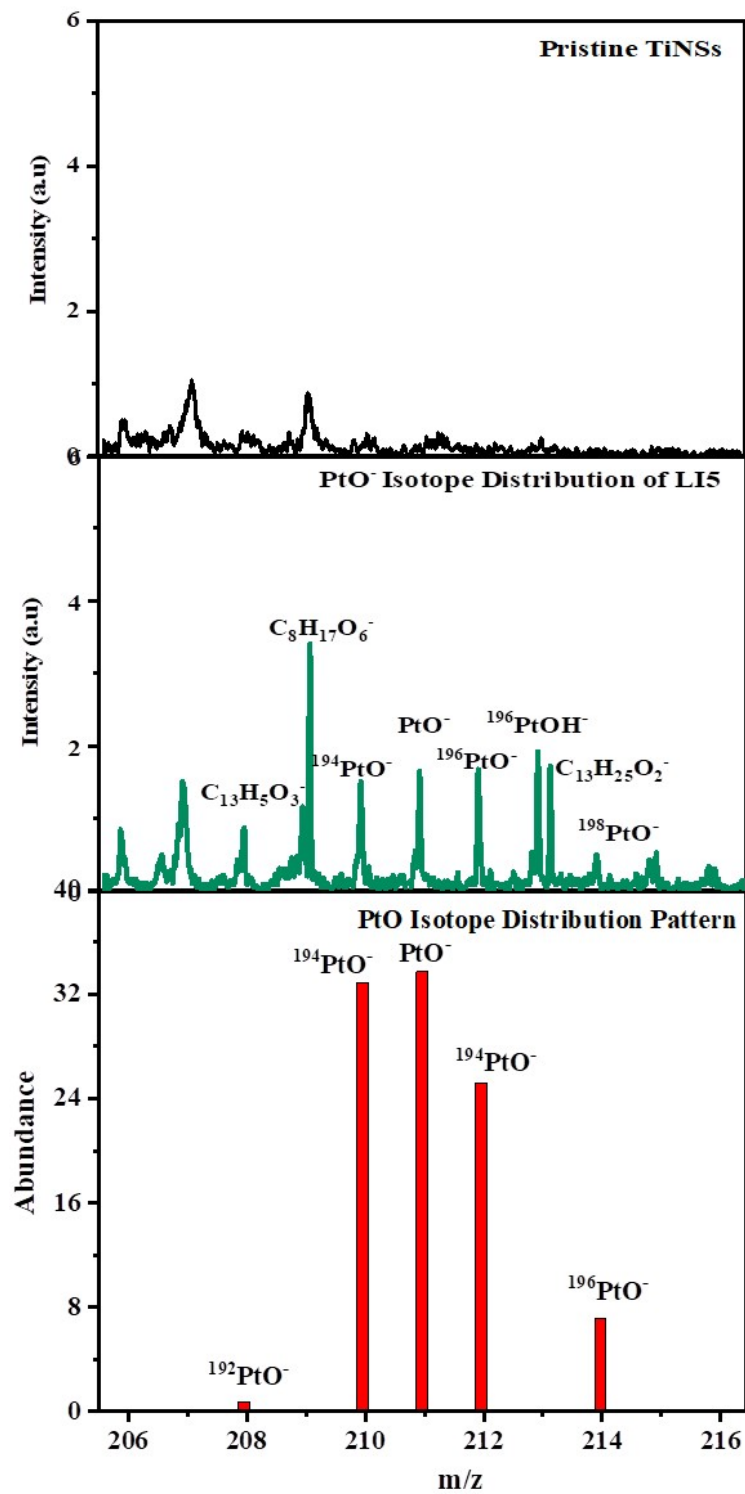

Fig. S6. Negative ToF-SIMS spectra of pristine and LI5 samples, along with the corresponding PtO isotope distribution pattern.



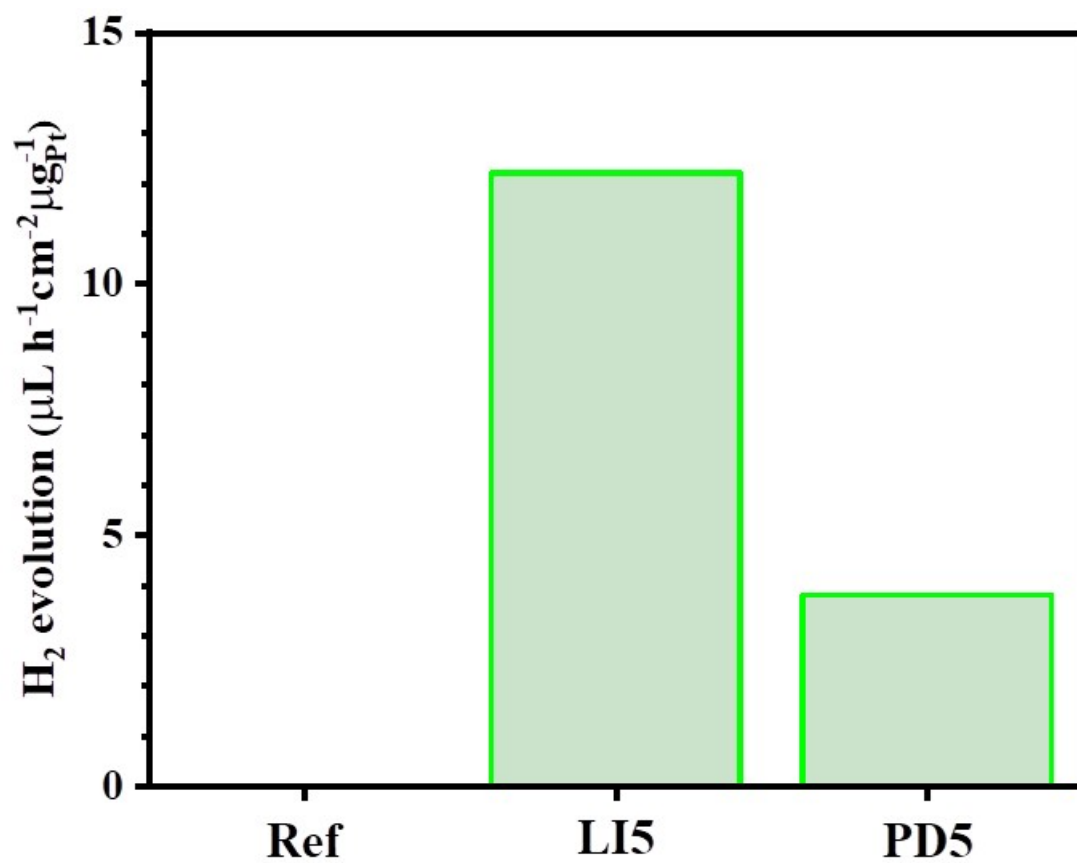

Fig. S7. Normalized hydrogen evolution rate of Ref, LI5, and PD5 samples with respect to Pt loading.
